# Supplementary material
Source: PubMed Central journal article supplement (PMC4871781)
Supplement: NIHMS739526-supplement-10120_2015_566_MOESM1_ESM.pdf [file NIHMS739526-supplement-10120_2015_566_MOESM1_ESM.pdf]

**A)**

|    | Surgical specimen staining pattern                                                                                           | Biopsy specimen staining pattern                                                                                                                      | HER2 overexpression assessment |
|----|------------------------------------------------------------------------------------------------------------------------------|-------------------------------------------------------------------------------------------------------------------------------------------------------|--------------------------------|
| 0  | No reactivity or membranous reactivity in <10% of tumour cells                                                               | No reactivity or no membranous reactivity in any tumour cell                                                                                          | Negative                       |
| 1+ | Faint or barely perceptible membranous reactivity in ≥10% of tumour cells; cells are reactive only in part of their membrane | Tumour cell cluster with a faint or barely perceptible membranous reactivity irrespective of percentage of tumour cells stained                       | Negative                       |
| 2+ | Weak to moderate complete, basolateral or lateral membranous reactivity in ≥10% of tumour cells                              | Tumour cell cluster with a weak to moderate complete, basolateral or lateral membranous reactivity irrespective of percentage of tumour cells stained | Equivocal                      |
| 3+ | Strong complete, basolateral or lateral membranous reactivity in ≥10% of tumour cells                                        | Tumour cell cluster with a strong complete, basolateral or lateral membranous reactivity irrespective of percentage of tumour cells stained           | Positive                       |

HER2=human epidermal growth factor receptor 2 (also known as ERBB2).

**Table 1:** Immunohistochemistry scoring for HER2 in gastric and gastro-oesophageal junction cancer, by type of diagnostic specimen

# B)

| Staining characteristics                                                                                                               | Score/classification                 | Example staining patterns                                                           |
|----------------------------------------------------------------------------------------------------------------------------------------|--------------------------------------|-------------------------------------------------------------------------------------|
| No staining/<br>membrane staining in<br><10% of tumour cells                                                                           | 0/negative                           | 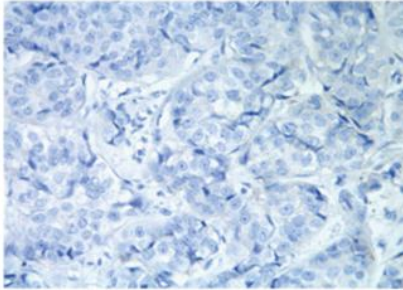   |
| Faint/barely<br>perceptible<br>membrane staining in<br>>10% of tumour cells;<br>cells are only stained<br>in part of their<br>membrane | 1+/negative                          |    |
| Weak or moderate<br>complete staining in<br>>10% of tumour cells                                                                       | 2+/equivocal<br>→ Retest with<br>ISH |  |
| Strong complete<br>membrane staining in<br>>10% of tumour cells                                                                        | 3+/positive                          |  |

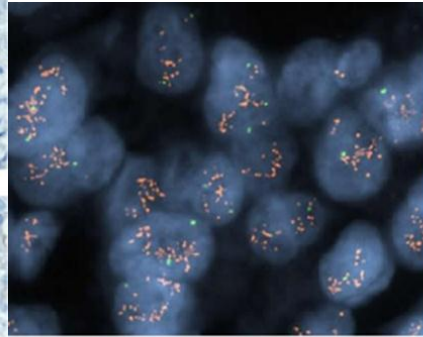

FISH+: ratio of HER2 (orange) signals to CEP17 (green) signals is  $\geq 2$  (PathVysion™ kit, PathVysion)

\*Although other commercial IHC-testing kits are available, HercepTest™ is the most commonly used.  
IHC, immunohistochemistry; ISH, *in situ* hybridisation



C)

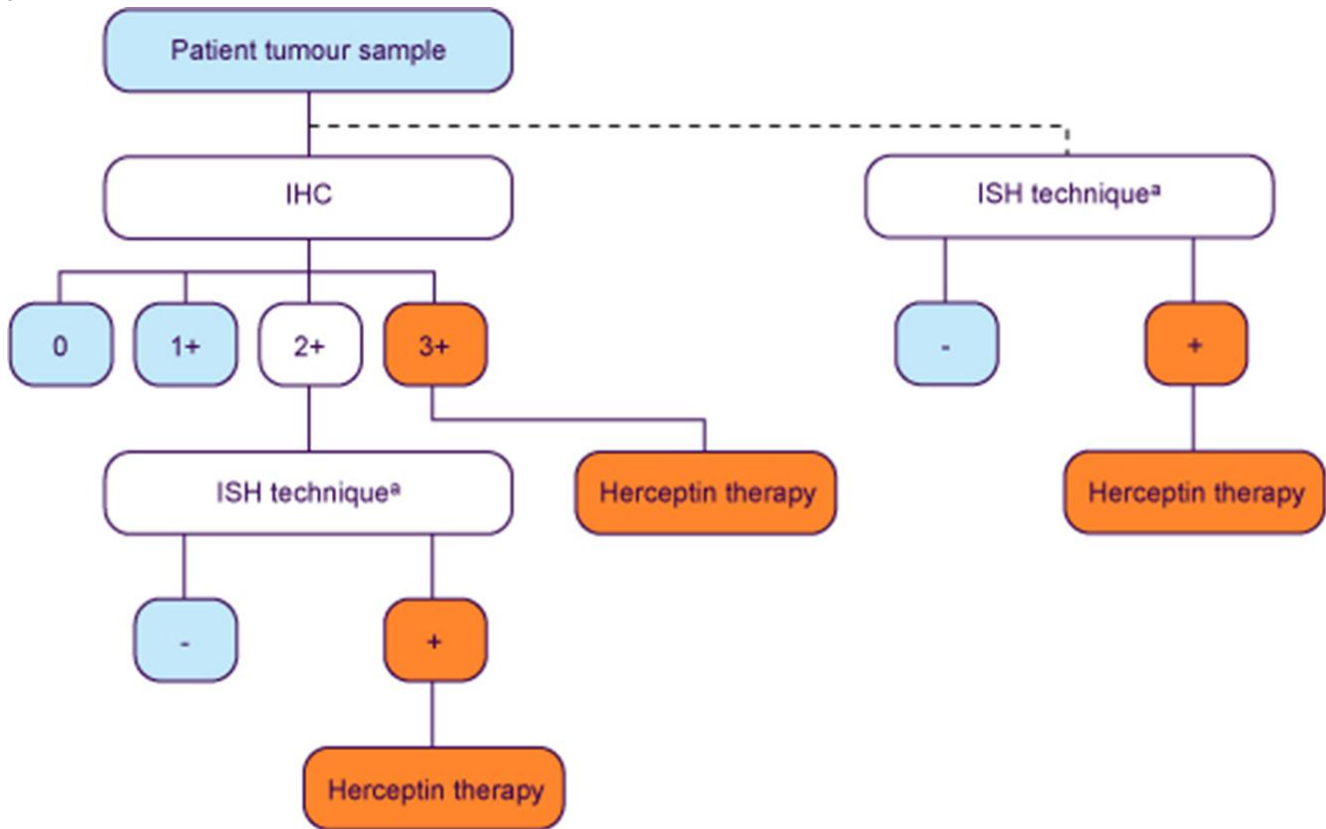

<sup>a</sup>ISH techniques used should have been validated and may include fluorescence, chromogenic or silver-enhanced ISH  
IHC, immunohistochemistry; ISH, *in situ* hybridisation

**Supplementary Figure 1:** Immunohistochemistry (IHC) and Fluorescence in situ hybridization (FISH) scoring for gastroesophageal adenocarcinoma. **(A)** Detailed IHC scoring criteria. **(B)** IHC imaging examples (left) and FISH imaging example (right). **(C)** Current Her2 status testing recommendation for identifying GEC patients eligible for trastuzumab (Herceptin) therapy. Taken from Bang *et al* Lancet 2010;376(9742):687-97 and Hoffmann *et al* Histopathology 2008;52(7):797-805.

**A)**

| HER2 status                 |           |           |
|-----------------------------|-----------|-----------|
| FISH positive/IHC 0         | 23 (8%)   | 38 (13%)  |
| FISH positive/IHC 1+        | 38 (13%)  | 32 (11%)  |
| FISH positive/IHC 2+        | 80 (27%)  | 79 (27%)  |
| FISH positive/IHC 3+        | 131 (45%) | 125 (43%) |
| FISH negative/IHC 3+        | 9 (3%)    | 6 (2%)    |
| FISH positive/IHC no result | 5 (2%)    | 2 (1%)    |
| FISH no result/IHC 3+       | 8 (3%)    | 8 (3%)    |

**B)**

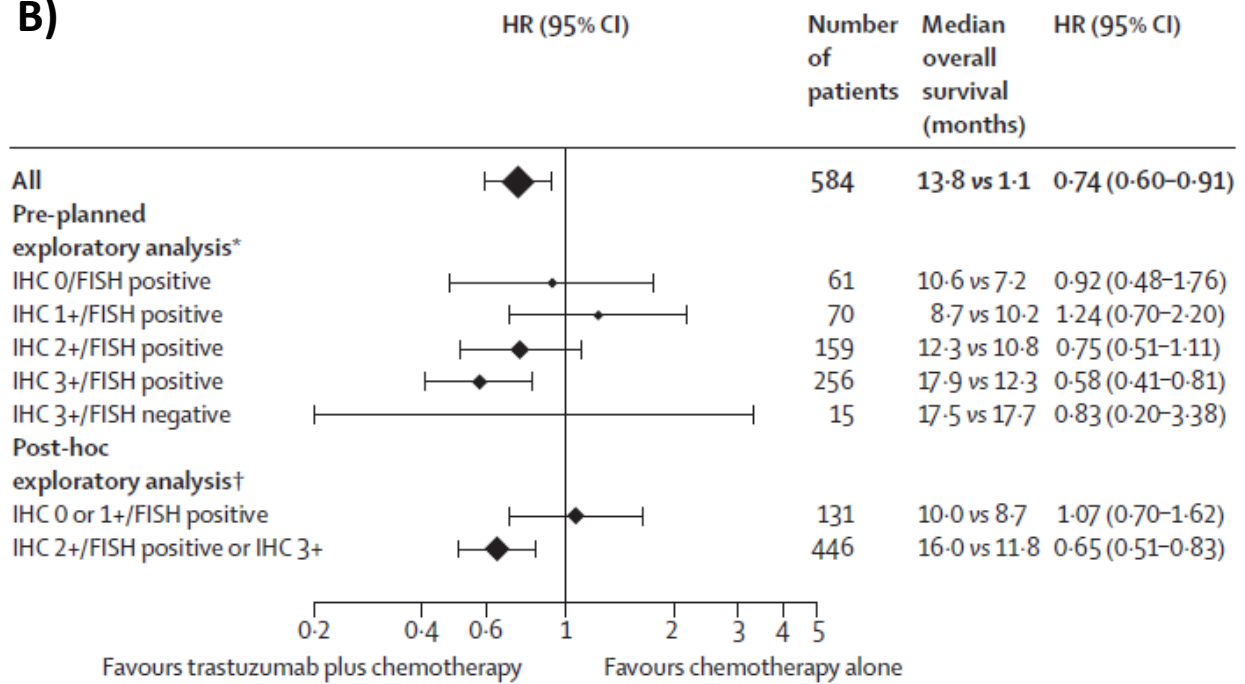

**Supplementary Figure 2: (A)** Breakdown of FISH and IHC status in the TOGA trial. **(B)** Clinical outcome based on pre-specified subgroup analyses. As in **Supplementary Figure 1C**, 'HER2+' now includes IHC2+/FISH+ and IHC3+ groups. Taken from Bang *et al* Lancet 2010;376(9742):687-97.

**A)**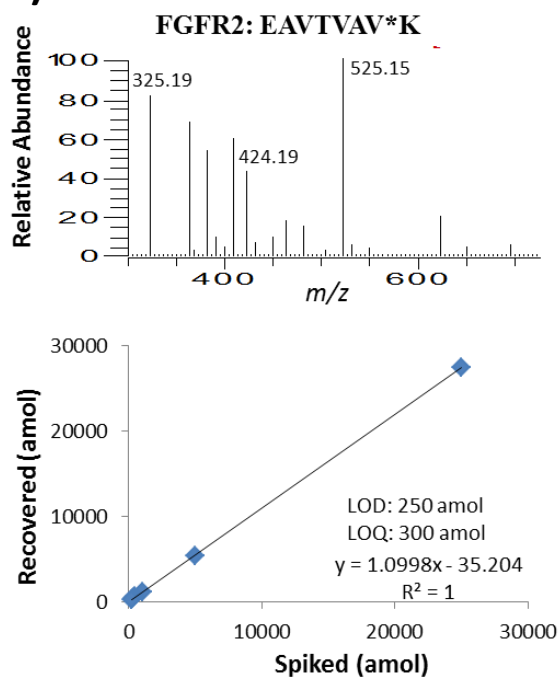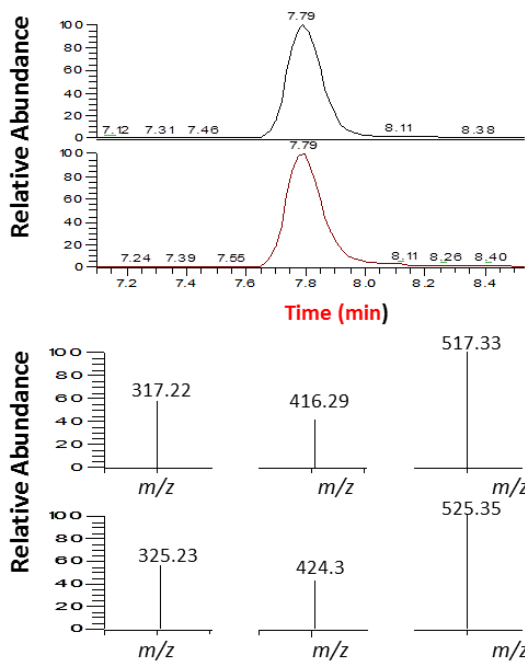**B)**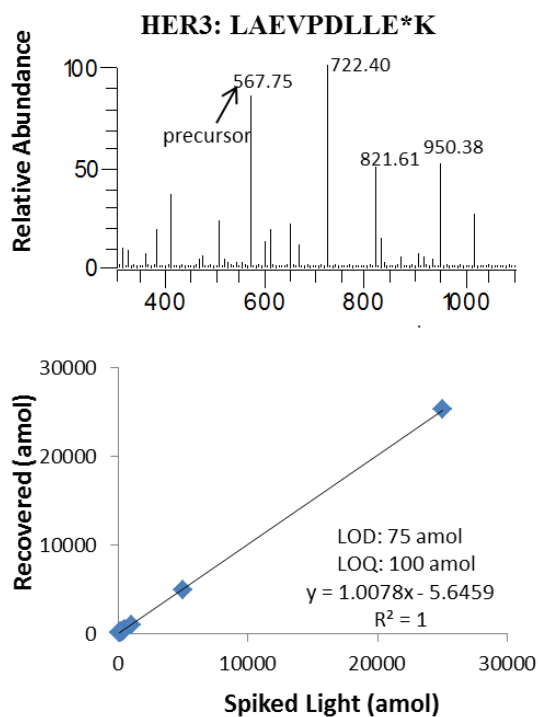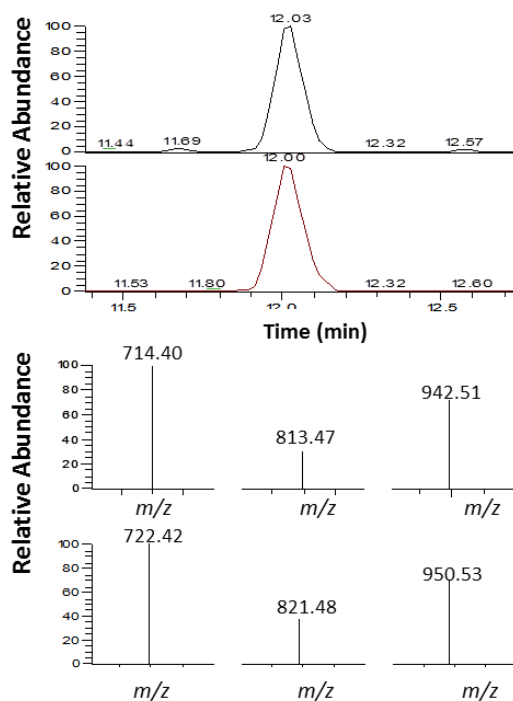

**Supplementary Figure 3: Development of (A) Fgfr2 and (B) Her3 SRM assays.** The fragmentation spectrum for heavy peptides (top lefts) and the standard curve generated in human PC3 cell lysates (bottom lefts) The total ion chromatograms for the light and heavy isotopically labeled peptides (top rights), with the transition ions used to identify and quantitate each peptide (bottom rights).

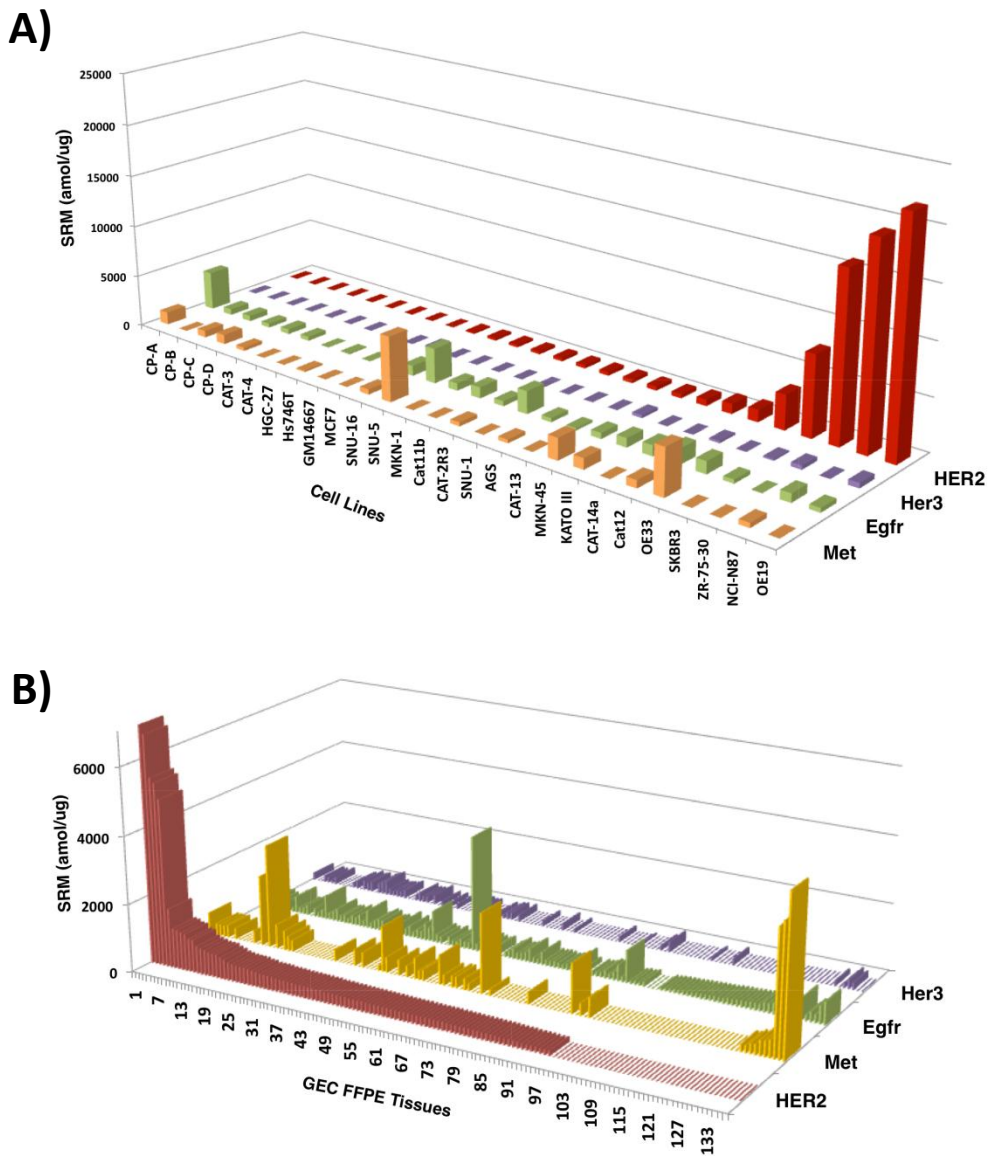

**Supplementary Figure 4: GEC cell lines (N=27) (A) and tissues (N=139) (B) multiplex expression for HER2, Met, Egfr, and Her3 within the ‘GEC-Plex’.** Samples sorted by HER2 expression. When adjusting for Her3-, Met-, and Egfr-SRM covariates, the correlation between HER2-SRM and *HER2* FISH significantly improved for both sample sets (see text and **Supplementary Table 5** for further details).
